# Supplementary material for: Tree-based differential testing using inferential uncertainty for RNA-seq
Source: Genome Res. 2025 Oct;35(10):2326–38. doi: 10.1101/gr.279981.124 (PMC12487820; doi:10.1101/gr.279981.124)
Supplement: Supplement 1 [file Supplemental_Tables.xlsx]

## Sheet: Table S1
Table S1 - Distribution of the height of the selected nodes output by mehenDi and candidate nodes by treeclimbR for the BrSimNorm dataset.
Height of nodes mehenDi treeclimbR	mehenDi	treeClimbR
1	4013	2941
2	554	326
3	256	164
4	125	116
5	62	80
2025-06-10	57	152
>10	5	39
Max height	14	19

## Sheet: Table S2
Table S2 - Proportion of unique nodes that are observed for mehenDi, treeclimbR when doing a pairwise comparison for the BrSimNorm dataset at different nominal FDR. The number inside the parentheses represents the total number of nodes.
Nominal FDR	0.01	0.05	0.1
mehenDi	0.085 (199)	0.412 (308)	0.606 (381)
treeclimbR(N)	0 (2)	0 (4)	0.25 (4)

## Sheet: Table S3
Table S3 - Proportion of unique nodes that are observed for Txps, treeclimbR when doing a pairwise comparison for the BrSimNorm dataset at different nominal FDR. The number inside the parentheses represents the total number of nodes.
Nominal FDR	0.01	0.05	0.1
Txps	0.103 (145)	0.416 (255)	0.590 (339)
treeclimbR(N)	0 (15)	0.24 (25)	0.481 (27)

## Sheet: Table S4
Table S4 - Accession IDs for the tissue samples for the MouseMuscle dataset that have been used for analysis in this paper.
Accession ID	Tissue Name
SRR5758666	MAST
SRR5758667	MAST
SRR5758668	MAST
SRR5758669	MAST
SRR5758670	MAST
SRR5758671	MAST
SRR5758630	EDL
SRR5758631	EDL
SRR5758632	EDL
SRR5758633	EDL
SRR5758634	EDL
SRR5758635	EDL

## Sheet: Table S5
Table S5 - Number of differentially expressed genes obtained at the different nominal thresholds for the MouseMuscle dataset between EDL and MAST.
Nominal FDR	0.01	0.05	0.1
Number of DEGs	2535	4494	5814

## Sheet: Table S6
Table S6 - Number of differentially expressed transcripts obtained at the different nominal FDR thresholds for the MouseMuscle dataset between EDL and MAST.
Nominal FDR	0.01	0.05	0.1
Number of DTEs	3149	6849	9592

## Sheet: Table S7
Table S7 - Distribution of the height of the mehenDi nodes for the MouseMuscle dataset.
Nominal FDR	0.01	0.05	0.1
1	2522	5406	7500
2	651	1285	1698
3	295	555	696
4	134	252	308
≥5	109	195	256

## Sheet: Table S8
Table S8 - Distribution of the total number of unique genes, the transcripts covered by mehenDi nodes map to the MouseMuscle dataset.
Nominal FDR	0.01	0.05	0.1
1	3672	7625	10369
2	33	56	73
3	3	8	9
4	0	4	4
5	1	0	0
7	0	0	1
9	0	0	2

## Sheet: Table S9
Table S9 - Number of differentially expressed genes (DEGs) that don’t contain a single underlying transcript that is called significant at the different nominal FDR thresholds for the MouseMuscle dataset.
Nominal FDR	0.01	0.05	0.1
Number of DEGs	685	839	907

## Sheet: Table S10
Table S10 - Number of differentially expressed transcripts (DETs) that don’t map to a single significant gene at the different nominal FDR thresholds for the MouseMuscle dataset.
Nominal FDR	0.01	0.05	0.1
Number of DEGs	835	1736	2214

[truncated: 8 more sheets: Table S11, Table S12, Table S13, Table S14, Table S15, Table S16, Table S17, Table S18]
